# Supplementary material for: A New Gal in Town: A Systematic Review of the Role of Galanin and Its Receptors in Experimental Pain
Source: MDPI journal article supplement (doi:10.3390/cells11050839), 2022-03-01
Supplement: s1 [file s1]

**Table S1.** Summary of the methodological quality of the included studies, assessed using the ARRIVE guidelines for the reporting of in vivo experiments. Summarised criteria: 1 – Study design; 2 – Sample size; 3 – Inclusion and exclusion criteria; 4 – Randomisation; 5 – Blinding; 6 – Outcome measures; 7 – Statistical methods; 8 – Experimental animals; 9 – Experimental procedures; 10 – Results; 11 – Abstract; 12 – Background; 13 – Objectives; 14 – Ethical statement; 15 – Housing and husbandry; 16 – Animal care and monitoring; 17 – Interpretation/scientific implications; 18 – Generalisability; 19 – Protocol registration; 20 – Data access; 21 – Declaration of interests (Red: absent, yellow: incomplete, green: complete).

|                                    | 1      | 2      | 3     | 4      | 5     | 6      | 7      | 8      | 9      | 10     | 11     | 12     | 13    | 14     | 15     | 16     | 17     | 18     | 20  | 21     |
|------------------------------------|--------|--------|-------|--------|-------|--------|--------|--------|--------|--------|--------|--------|-------|--------|--------|--------|--------|--------|-----|--------|
| Post et al., 1988 (1)              | Green  | Yellow | Red   | Yellow | Green | Yellow | Yellow | Green  | Green  | Yellow | Red    | Yellow | Green | Red    | Red    | Red    | Yellow | Yellow | Red | Red    |
| Wiesenfeld-Hallin et al., 1990 (2) | Yellow | Red    | Green | Red    | Red   | Yellow | Red    | Green  | Green  | Yellow | Yellow | Yellow | Green | Red    | Red    | Red    | Yellow | Green  | Red | Yellow |
| Xu et al., 1991 (3)                | Red    | Red    | Red   | Red    | Red   | Green  | Yellow | Green  | Green  | Green  | Yellow | Green  | Green | Red    | Red    | Red    | Yellow | Yellow | Red | Red    |
| Kuraishi et al., 1991a (4)         | Red    | Red    | Red   | Red    | Red   | Green  | Yellow | Green  | Red    | Green  | Yellow | Yellow | Red   | Yellow | Green  | Red    | Yellow | Yellow | Red | Red    |
| Kuraishi et al., 1991b (5)         | Red    | Red    | Red   | Red    | Red   | Green  | Red    | Green  | Green  | Green  | Yellow | Yellow | Green | Red    | Red    | Red    | Yellow | Yellow | Red | Red    |
| Wiesenfeld-Hallin et al., 1993 (6) | Red    | Red    | Red   | Red    | Green | Yellow | Red    | Green  | Green  | Green  | Red    | Yellow | Green | Yellow | Red    | Red    | Yellow | Green  | Red | Yellow |
| Reimann et al., 1994 (7)           | Red    | Red    | Red   | Red    | Red   | Green  | Green  | Green  | Green  | Yellow | Green  | Green  | Green | Red    | Red    | Red    | Green  | Green  | Red | Red    |
| Przewlocka et al., 1995 (8)        | Red    | Red    | Red   | Red    | Red   | Green  | Yellow | Green  | Green  | Yellow | Yellow | Yellow | Green | Red    | Green  | Yellow | Green  | Yellow | Red | Yellow |
| Xu et al., 1997a (9)               | Green  | Green  | Red   | Red    | Green | Green  | Green  | Green  | Green  | Green  | Green  | Green  | Green | Green  | Red    | Yellow | Green  | Green  | Red | Yellow |
| Xu et al., 1997b (10)              | Red    | Red    | Red   | Red    | Red   | Green  | Green  | Green  | Green  | Yellow | Yellow | Green  | Green | Green  | Red    | Green  | Green  | Yellow | Red | Yellow |
| Wang et al., 1999 (11)             | Green  | Yellow | Green | Red    | Red   | Green  | Yellow | Green  | Green  | Green  | Yellow | Yellow | Green | Green  | Red    | Red    | Red    | Yellow | Red | Yellow |
| Rezaei et al., 2000 (12)           | Red    | Red    | Green | Red    | Red   | Red    | Yellow | Green  | Green  | Yellow | Yellow | Yellow | Green | Red    | Red    | Green  | Yellow | Yellow | Red | Yellow |
| Blakeman et al., 2001 (13)         | Red    | Red    | Red   | Red    | Green | Green  | Yellow | Yellow | Yellow | Yellow | Yellow | Green  | Green | Green  | Yellow | Green  | Green  | Yellow | Red | Yellow |
| Grass et al., 2003a (14)           | Green  | Yellow | Green | Red    | Red   | Green  | Green  | Green  | Green  | Yellow | Yellow | Green  | Green | Green  | Yellow | Red    | Green  | Yellow | Red | Yellow |
| Grass et al., 2003b (15)           | Red    | Red    | Green | Red    | Red   | Green  | Green  | Green  | Green  | Yellow | Yellow | Green  | Green | Yellow | Yellow | Green  | Green  | Yellow | Red | Yellow |
| Ackermann et al., 2003 (16)        | Red    | Red    | Red   | Red    | Red   | Red    | Yellow | Green  | Green  | Yellow | Yellow | Yellow | Green | Green  | Yellow | Red    | Yellow | Yellow | Red | Yellow |
| Hua et al., 2004 (17)              | Green  | Yellow | Red   | Red    | Red   | Green  | Green  | Green  | Green  | Yellow | Green  | Yellow | Red   | Green  | Green  | Yellow | Green  | Green  | Red | Yellow |
| Sun & Yu, 2005 (18)                | Red    | Red    | Green | Red    | Red   | Green  | Yellow | Green  | Green  | Yellow | Yellow | Yellow | Green | Red    | Yellow | Yellow | Yellow | Yellow | Red | Yellow |
| Wu & Yu, 2006 (19)                 | Green  | Yellow | Red   | Red    | Red   | Green  | Yellow | Green  | Green  | Green  | Yellow | Yellow | Green | Yellow | Green  | Green  | Green  | Yellow | Red | Yellow |
| Sun et al., 2007 (20)              | Green  | Yellow | Red   | Red    | Red   | Green  | Yellow | Green  | Green  | Green  | Green  | Green  | Green | Yellow | Yellow | Green  | Green  | Yellow | Red | Yellow |
| Zubrzycka & Janecka, 2007 (21)     | Green  | Yellow | Green | Red    | Red   | Green  | Yellow | Green  | Green  | Green  | Green  | Yellow | Green | Red    | Red    | Green  | Green  | Yellow | Red | Yellow |

[illegible]

[illegible]

[illegible]

[illegible]

[illegible]

**Table S2.** Summary of the literature search on the role of galanin and its receptors in the processing of nociceptive information.

| Article                            | Results - Galanin                                                                                                                                                                                                               | Results - Galanin Receptors                                          | Experimental subjects            |
|------------------------------------|---------------------------------------------------------------------------------------------------------------------------------------------------------------------------------------------------------------------------------|----------------------------------------------------------------------|----------------------------------|
| Post et al., 1988 (1)              | Intrathecal administration of galanin - antinociceptive effect (thermal and mechanical sensitivity)                                                                                                                             | -                                                                    | Male NRMI mice                   |
| Wiesenfeld-Hallin et al., 1990 (2) | Intrathecal administration of galanin - no effect (flexor reflex). Galanin potentiates the analgesic effect of morphine.                                                                                                        | -                                                                    | Male Sprague-Dawley rats         |
| Xu et al., 1991 (3)                | Intrathecal administration of galanin - antinociceptive effect (flexor reflex)                                                                                                                                                  | -                                                                    | Male Sprague-Dawley rats         |
| Kuraishi et al., 1991a (4)         | Intrathecal administration of galanin - antinociceptive effect (thermal and mechanical sensitivity). Galanin present in the dorsal horn is involved in the transmission of mechanical, but not thermal nociceptive information. | -                                                                    | Male Sprague-Dawley rats         |
| Kuraishi et al., 1991b (5)         | Intrathecal administration of galanin - antinociceptive effect (thermal sensitivity). Substance P is involved in galanin-induced antinociception.                                                                               | -                                                                    | Male Sprague-Dawley rats         |
| Wiesenfeld-Hallin et al., 1993 (6) | Intrathecal administration of galanin - antinociceptive effect (thermal and mechanical sensitivity)                                                                                                                             | -                                                                    | Male Sprague-Dawley rats         |
| Reimann et al., 1994 (7)           | Role of endogenous galanin in nociceptive processing – antinociceptive effect. Galanin is involved in the spinal effects of morphine.                                                                                           | -                                                                    | Male Sprague-Dawley rats         |
| Przewlocka et al., 1995 (8)        | Intracerebroventricular administration of galanin - no effect (thermal and mechanical sensitivity). Galanin potentiates the analgesic effect of morphine.                                                                       | -                                                                    | Male Wistar rats                 |
| Xu et al., 1997a (9)               | Increased galanin levels in sensory neurons after RTX                                                                                                                                                                           | -                                                                    | Male Sprague-Dawley rats         |
| Xu et al., 1997b (10)              | Intrathecal galanin - antinociceptive effect (reduced spinal flexor reflex hyperexcitability)                                                                                                                                   | -                                                                    | Female Sprague-Dawley rats       |
| Wang et al., 1999 (11)             | Intra-periaqueductal grey injection - antinociceptive effect (thermal and mechanical sensitivity). Interaction between galanin and opioids.                                                                                     | -                                                                    | Male Sprague-Dawley rats         |
| Rezaei et al., 2000 (12)           | Intrathecal administration of galanin - antinociceptive effect (flexor reflex)                                                                                                                                                  | Inactivation of GalR1 - blockade of the inhibitory effect of galanin | Female Sprague-Dawley rats       |
| Blakeman et al., 2001 (13)         | Overexpression of galanin - antinociceptive effect (thermal and mechanical sensitivity)                                                                                                                                         | -                                                                    | Both male and female Gal-OE mice |
| Grass et al., 2003a (14)           | Overexpression of galanin – antinociceptive effect (reduced facilitation of the nociceptive flexor reflex)                                                                                                                      | -                                                                    | Both male and female Gal-OE mice |

|                                |                                                                                                                                                                                                                            |                                                                                                                                                                                                                                            |                                          |
|--------------------------------|----------------------------------------------------------------------------------------------------------------------------------------------------------------------------------------------------------------------------|--------------------------------------------------------------------------------------------------------------------------------------------------------------------------------------------------------------------------------------------|------------------------------------------|
| Grass et al., 2003b (15)       | Intrathecal administration of galanin – antinociceptive effect (flexor reflex)                                                                                                                                             | Galanin antinociceptive effect is probably mediated by receptors other than GalR1                                                                                                                                                          | Male GalR1-KO mice                       |
| Ackermann et al., 2003 (16)    | Increased galanin – antinociceptive effect (mechanical sensitivity)                                                                                                                                                        | -                                                                                                                                                                                                                                          | Male Sprague-Dawley rats                 |
| Hua et al., 2004 (17)          | Intrathecal administration of Galanin - antinociceptive effect (formalin-induced nociception).<br>Galanin potentiates intrathecal morphine and AP-5-induced antinociception.                                               | The antinociceptive effect of intrathecal galanin is mediated by activation of spinal GalR1, but not GalR2 receptors                                                                                                                       | Male Sprague-Dawley rats                 |
| Sun & Yu, 2005 (18)            | Injection of galanin to the arcuate nucleus of the hypothalamus - antinociceptive effect (thermal and mechanical sensitivity)                                                                                              | -                                                                                                                                                                                                                                          | Male Wistar Han rats                     |
| Wu & Yu, 2006 (19)             | Intracerebroventricular administration of galanin - antinociceptive effect (thermal and mechanical sensitivity)                                                                                                            | -                                                                                                                                                                                                                                          | Male Wistar rats                         |
| Sun et al., 2007 (20)          | Injection of galanin to the arcuate nucleus of the hypothalamus - antinociceptive (thermal and mechanical sensitivity).<br>Galaninergic fibres directly innervate $\beta$ -endorphinergic neurons in this area.            | -                                                                                                                                                                                                                                          | Male Wistar rats                         |
| Zubrzycka & Janecka, 2007 (21) | Intracerebroventricular administration of galanin – antinociceptive effect (trigemino-hypoglossal reflex)                                                                                                                  | -                                                                                                                                                                                                                                          | Male Long-Evans rats                     |
| Zubrzycka & Janecka, 2008 (22) | Intracerebroventricular administration of galanin - antinociceptive (trigemino-hypoglossal reflex).<br>Galanin exerts its antinociceptive effects in the orofacial area through the $\mu$ -opioid receptor.                | -                                                                                                                                                                                                                                          | Male Long-Evans rats                     |
| Allier et al., 2008 (23)       |                                                                                                                                                                                                                            | (1) GalR1 receptors are located predominantly post-synaptically whereas GalR2 receptors may be localized both pre- and post-synaptically, (2) activation of either GalR1 or GalR2 can have both antinociceptive and pronociceptive effects | Both male and female Sprague-Dawley rats |
| Hobson et al., 2009 (24)       |                                                                                                                                                                                                                            | The absence of GalR2 expression induces the loss of a subset of sensory neurons                                                                                                                                                            | Male GalR2-MUT mice                      |
| Jin et al. 2010 (25)           | Injection of galanin to the central nucleus of the amygdala - antinociceptive effect (thermal and mechanical sensitivity).<br>Both $\mu$ - and $\delta$ -opioid receptors are involved in galanin-induced antinociception. |                                                                                                                                                                                                                                            | Male Wistar rats                         |
| Fu et al., 2011 (26)           | Intracerebroventricular administration of galanin - antinociceptive effect (thermal and mechanical sensitivity)                                                                                                            | GalR1 as an antinociceptive target in the brain                                                                                                                                                                                            | Male Sprague-Dawley rats                 |
| Shi et al., 2011 (27)          | Intracerebroventricular administration of galanin - antinociceptive effect (thermal and mechanical sensitivity).                                                                                                           |                                                                                                                                                                                                                                            | Male Sprague-Dawley rats                 |



|                           |                                                                                                                                                                                                                                                                    |                                                                                                                                 |                               |
|---------------------------|--------------------------------------------------------------------------------------------------------------------------------------------------------------------------------------------------------------------------------------------------------------------|---------------------------------------------------------------------------------------------------------------------------------|-------------------------------|
|                           | PKC is involved in galanin-induced antinociception                                                                                                                                                                                                                 |                                                                                                                                 |                               |
| Yue et al., 2011 (28)     | Galanin at lower concentrations enhances the spontaneous release of L-glutamate onto substantia nigra neurons from nerve terminals by activating GalR2/R3, whereas galanin at higher concentrations also produces a membrane hyperpolarization by activating GalR1 |                                                                                                                                 | Male Sprague-Dawley rats      |
| Lemons & Wiley, 2011 (29) |                                                                                                                                                                                                                                                                    | Selective destruction of GalR1-expressing superficial dorsal horn neurons produces heat hypoalgesia                             | Female Long Evans hooded rats |
| Li et al., 2012 (30)      | Injection of galanin to the central nucleus of the amygdala – antinociceptive effect (thermal and mechanical sensitivity)                                                                                                                                          | GalR1 as an antinociceptive target in the central nucleus of the amygdala                                                       | Male Sprague-Dawley rats      |
| Xu et al, 2012 (31)       | Injection of galanin to the nucleus accumbens - antinociceptive effect (thermal and mechanical sensitivity)                                                                                                                                                        |                                                                                                                                 | Male Sprague-Dawley rats      |
| Kong & Yu, 2013 (32)      | Intra-periaqueductal grey injection antinociceptive effect (thermal and mechanical sensitivity)                                                                                                                                                                    | Activation of GalR1 induces antinociception in rats with morphine tolerance.                                                    | Male Sprague-Dawley rats      |
| Zhang et al., 2015 (33)   | Intra-periaqueductal grey injection - antinociceptive (thermal and mechanical).<br>CAMKII may be involved in galanin-induced antinociception.                                                                                                                      | GalR2 antagonist administration (M871) - pronociceptive                                                                         | Male Sprague-Dawley rats      |
| Pulse et al., 2016 (34)   | Administration of galanin to the saphenous nerve truck – antinociceptive effect (inhibits axonal excitability)                                                                                                                                                     |                                                                                                                                 | Male Wistar rats              |
| Fu et al., 2016 (35)      | Intra-lateral habenula complex injection - antinociceptive effect (thermal and mechanical sensitivity)                                                                                                                                                             | GalR1 as an antinociceptive target in the lateral habenula                                                                      | Male Sprague-Dawley rats      |
| Taylor et al., 2020 (36)  | Galanin in the lumbar splanchnic nerve (LSN) – antinociceptive effect (mechanical sensitivity)                                                                                                                                                                     | GalR1 activation, but not GalR2/3 activation, suppresses mechanosensitivity - GalR1 mediates the suppressive effect of galanin. | Male and female C57BL/6J mice |

**Table S3.** Summary of the literature search on the role of galanin and its receptors in different animal models of experimental pain. ACC - anterior cingulate cortex; ARC – arcuate nucleus of the hypothalamus; DRG – dorsal root ganglia; NAc – nucleus accumbens.

| Article                             | Results - Galanin                                                                                                                                                       | Results - Galanin Receptors                        | Animal model                                                 | Experimental subjects      |
|-------------------------------------|-------------------------------------------------------------------------------------------------------------------------------------------------------------------------|----------------------------------------------------|--------------------------------------------------------------|----------------------------|
| Wiesenfeld-Hallin et al., 1989 (37) | Galanin had a biphasic effect on the flexor reflex in rats with intact nerves, including facilitation, followed by depression, in a dose-dependent manner.              |                                                    | Sciatic nerve axotomy                                        | Sprague-Dawley rats        |
| Sato et al, 1992 (38)               | Antinociceptive role of galanin - intrathecal injections of antibodies against galanin inhibited carrageenan-induced hyperalgesia                                       |                                                    | Repeated cold stress (RCS)-induced hyperalgesia + Carragenan | Male Sprague–Dawley rats   |
| Wiesenfeld-Hallin et al., 1992 (39) | Antinociceptive role of galanin - M-35 (galanin receptor antagonist) has a facilitatory effect on flexor reflex excitability, which was potentiated after nerve axotomy |                                                    | Sciatic nerve axotomy                                        | Female Sprague-Dawley rats |
| Lundeberg et al., 1993 (40)         | Galanin inhibits carrageenan-induced mechanical hyperalgesia by inhibiting the release of oxytocin from nerve terminals in the spinal cord                              |                                                    | Carragenan-induced inflammation                              | Male Sprague-Dawley rats   |
| Zhang et al., 1993 (41)             | Increase in galanin-positive cells after axotomy (DRG)                                                                                                                  |                                                    | Sciatic nerve axotomy                                        | Female monkeys             |
| Verge et al., 1993 (42)             | Antinociceptive role of galanin - M-35 (galanin receptor antagonist) enhances autotomy behaviour in rats after sciatic nerve section                                    |                                                    | Sciatic nerve axotomy                                        | Male Sprague–Dawley rats   |
| Hope et al., 1994 (43)              | Increase in galanin-positive cells after flexion of inflamed ankles (SDH)                                                                                               |                                                    | Freund's adjuvant (ankle)                                    | Both male and female rats  |
| Nahin et al., 1994 (44)             | Increase in galanin mRNA levels after CCI (primary sensory neurons)                                                                                                     |                                                    | Chronic constriction injury (CCI) of the sciatic nerve       | Male Sprague-Dawley rats   |
| Ji et al., 1994 (45)                | Upregulation of galanin in DRG neurons after axotomy - antinociceptive                                                                                                  |                                                    | Sciatic nerve axotomy                                        | Male Sprague-Dawley rats   |
| Luo & Wiesenfeld-Hallin, 1995 (46)  | Intrathecal galanin - antinociceptive effect (blocked both components of reflex hyperexcitability following sciatic nerve section).                                     |                                                    | Sciatic nerve axotomy                                        | Female Sprague-Dawley rats |
| Xu et al., 1996 (47)                | Upregulation of Galanin in DRG neurons after axotomy – antinociceptive effect. DRG neurones are sensitive to galanin.                                                   | GalR1 receptors are involved in sensory processing | Carrageenan + sciatic nerve axotomy                          | Male Sprague–Dawley rats   |

|                               |                                                                                                                                                                                                                                                                                                                                                                                                                                                            |                                                                                                                                                                                                                                                     |                                                        |                                                         |
|-------------------------------|------------------------------------------------------------------------------------------------------------------------------------------------------------------------------------------------------------------------------------------------------------------------------------------------------------------------------------------------------------------------------------------------------------------------------------------------------------|-----------------------------------------------------------------------------------------------------------------------------------------------------------------------------------------------------------------------------------------------------|--------------------------------------------------------|---------------------------------------------------------|
| Barajon et al., 1996 (48)     | Increased expression of Galanin in DRG, decreased in the spinal cord and sciatic nerve                                                                                                                                                                                                                                                                                                                                                                     |                                                                                                                                                                                                                                                     | Cisplatin                                              | Female Wistar rats                                      |
| Munglani et al., 1996 (49)    | Decrease in galanin-positive cells (primary afferent neurones and spinal cord) after sciatic nerve compression                                                                                                                                                                                                                                                                                                                                             |                                                                                                                                                                                                                                                     | Chronic constriction injury (CCI) of the sciatic nerve | Glaxo-bred, random hooded rats                          |
| Rydh-Rinder et al., 1996 (50) | Moderate increase in galanin-positive cells in DRG and spinal cord after axotomy                                                                                                                                                                                                                                                                                                                                                                           |                                                                                                                                                                                                                                                     | Sciatic nerve axotomy                                  | Male guinea-pigs                                        |
| Carlton et al., 1996 (51)     | Increase in galanin-positive cells after peripheral nerve injury (dorsal horn)                                                                                                                                                                                                                                                                                                                                                                             |                                                                                                                                                                                                                                                     | Spinal nerve ligation                                  | Male monkeys                                            |
| Ji et al., 1996 (52)          | Upregulation of galanin in DRG neurons after axotomy                                                                                                                                                                                                                                                                                                                                                                                                       |                                                                                                                                                                                                                                                     | Sciatic nerve axotomy                                  | Male Sprague-Dawley rats                                |
| Corness et al., 1996 (53)     | Upregulation of Galanin in DRG after axotomy. Leukaemia inhibitory factor (LIF) is important for the dramatic upregulation of GAL seen after axotomy                                                                                                                                                                                                                                                                                                       |                                                                                                                                                                                                                                                     | Sciatic nerve axotomy                                  | WT and leukaemia inhibitory factor (LIF)-deficient mice |
| Calzá et al., 1997 (54)       | As soon as signs of inflammation appear, there is a decrease in immunostaining for galanin in fibres in the superficial layers of the spinal cord. Peptide content then gradually increases, so that after 21 days a recovery can be observed. Galanin is also expressed in interneurons on the superficial dorsal horn, and galanin mRNA expression increased in small neurons in layers I and II during chronic inflammation 21 days after CFA injection |                                                                                                                                                                                                                                                     | Adjuvant arthritis                                     | Male Sprague-Dawley rats                                |
| Sten Chi et al., 1997 (55)    |                                                                                                                                                                                                                                                                                                                                                                                                                                                            | GalR1 and GalR2 are expressed in rat DRG neurons under normal circumstances. Both GalR2 and GalR1 mRNA levels decrease after axotomy. Inflammation increased both GalR2 mRNA levels and number of positive neurons, whereas GalR1 is downregulated. | Carragenan + Sciatic nerve axotomy                     | Male Sprague-Dawley rats                                |

|                         |                                                                                                                                                                                                                                                                                                                           |  |                                                                                                |                              |
|-------------------------|---------------------------------------------------------------------------------------------------------------------------------------------------------------------------------------------------------------------------------------------------------------------------------------------------------------------------|--|------------------------------------------------------------------------------------------------|------------------------------|
| Ma & Bisby, 1997 (56)   | Increase in Galanin-positive cells after sciatic nerve injury in the ipsilateral dorsal root ganglia and the superficial laminae of the dorsal horn and the gracile nuclei. In partial injury models, the percentages of galanin-immunoreactive DGR neurons were significantly higher than in complete nerve transection. |  | Complete transection, partial transection and chronic constriction injury of the sciatic nerve | Male Sprague-Dawley rats     |
| Long et al., 1998       | Increased expression of Galanin within IAN neuromas at 3 days after nerve section and ligation                                                                                                                                                                                                                            |  | Inferior alveolar nerve neuroma (IAN)                                                          | Both male and female ferrets |
| Sten Chi et al., 1998   | Galanin was upregulated in DRG neurons after peripheral axotomy                                                                                                                                                                                                                                                           |  | Sciatic nerve axotomy                                                                          | Female C57/BL6 mice          |
| Fukuoka et al., 1998    | The numbers of neurons expressing galanin in the L5 DRG increased 7 days after axotomy. However, L5 spinal nerve ligation had no effect on the number of galanin mRNA-expressing neurons in neighbouring intact L4 DRG.                                                                                                   |  | Spinal nerve ligation (SPNL) + Sciatic nerve axotomy                                           | Male Sprague-Dawley rats     |
| Colvin et al., 1998     | High intensity electrical stimulation of the injured nerve resulted in a further increase in immunoreactive-galanin release in the superficial dorsal horn, with no significant persistence of galanin after release.                                                                                                     |  | Chronic constriction injury (CCI) of the sciatic nerve                                         | Rats                         |
| Ma & Bisby, 1999a       | Two weeks after CCI, galanin-immunoreactive axonal fibres were dramatically increased in the ipsilateral gracile nuclei                                                                                                                                                                                                   |  | Chronic constriction injury (CCI) of the sciatic nerve                                         | Male Sprague-Dawley rats     |
| Long-Chuan et al., 1999 | Intrathecal administration of galanin – antinociceptive effect (thermal and mechanical stimulation)                                                                                                                                                                                                                       |  | Chronic constriction injury (CCI) of the sciatic nerve                                         | Male Sprague-Dawley rats     |
| Ma & Bisby, 1999b       | 4 and 14 days after PSNL the percentages of galanin mRNA positive neurons were significantly increased in the ipsilateral DRG compared to the contralateral side                                                                                                                                                          |  | Partial sciatic nerve ligation (PSNL)                                                          | Male Sprague-Dawley rats     |
| Sten Chi et al., 1999   | Increase in the number of galanin-immunoreactive and galanin messenger RNA-positive neuron profiles in ipsilateral DRG in all types of nerve injury models                                                                                                                                                                |  | Photochemical lesion + chronic constriction injury of the sciatic nerve + axotomy              | Male Sprague-Dawley rats     |

|                           |                                                                                                                                                                                                                                                                                                                                                                                                                                      |  |                                                                    |                          |
|---------------------------|--------------------------------------------------------------------------------------------------------------------------------------------------------------------------------------------------------------------------------------------------------------------------------------------------------------------------------------------------------------------------------------------------------------------------------------|--|--------------------------------------------------------------------|--------------------------|
| Hao et al., 1999 (57)     | Intrathecal galanin - antinociceptive effect (alleviated mechanical- and cold-allodynia-like behaviours)                                                                                                                                                                                                                                                                                                                             |  | Photochemically induced sciatic nerve injury                       | Male Sprague–Dawley rats |
| Calzá et al., 2000 (58)   | Upregulation of galanin mRNAs in DRGs in both the acute and remission stages of arthritis, specially at time-course points with high inflammation and severe joint destruction                                                                                                                                                                                                                                                       |  | Adjuvant arthritis                                                 | Male Sprague–Dawley rats |
| Honore et al., 2000 (59)  | Increase in galanin-expressing neurons in DRG                                                                                                                                                                                                                                                                                                                                                                                        |  | Sciatic nerve ligation (SNL) and nerve transection + CFA injection | Male C3H/HeJ mice        |
| Wang et al., 2000 (60)    | Intra-PAG administration of galanin - antinociceptive effect in rats with mononeuropathy. PAG is one of the key sites of the interaction between galanin and opioids in rats with mononeuropathy                                                                                                                                                                                                                                     |  | Chronic constriction injury (CCI) of the sciatic nerve             | Male Sprague–Dawley rats |
| Liu et al., 2000 (61)     | Intrathecal administration of galanin - antinociceptive. M35 (galanin receptor antagonist) had no agonistic effect in the spinal cord                                                                                                                                                                                                                                                                                                |  | Chronic constriction injury (CCI) of the sciatic nerve             | Male Sprague–Dawley rats |
| Xu et al., 2000 (62)      | Galanin inhibited the activity of WDR neurons in a dose-dependent fashion. The effect of galanin was more pronounced in sciatic nerve ligated rats than intact rats. Administration of the galantide (galanin antagonist) - increase in the WDR neuron discharge frequency.                                                                                                                                                          |  | Chronic constriction injury (CCI) of the sciatic nerve             | Male Sprague–Dawley rats |
| Zhang et al., 2000a (63)  | Galanin acts synergically with opioids to inhibit the nociceptive information transmission.                                                                                                                                                                                                                                                                                                                                          |  | Sciatic nerve ligation                                             | Male Sprague–Dawley rats |
| Zhang et al., 2000b (64)  | Specific interaction between galanin and opioids in the spinal cord of neuropathic rats, related to the activation of $\mu$ -opioid receptors.                                                                                                                                                                                                                                                                                       |  | Chronic constriction injury (CCI) of the sciatic nerve             | Male Sprague–Dawley rats |
| Bradley et al., 2001 (65) | Knockout of galanin - antinociceptive. Gal-KO mice are hypo-responsive in the formalin test; display a decrease of post-CS facilitation of spinal reflexes and a decrease in spinal hyperexcitability following peripheral inflammation. Endogenous galanin is necessary for the full expression of central sensitization, and as such, plays a critical role in the development of hyperalgesia following peripheral tissue injury. |  | Carragenan                                                         | Adult mice of both sexes |
| Hu & McLachlan, 2001 (66) | Intrathecal administration of galanin – antinociceptive effect (mechanical stimulation) Intrathecal injection of a galanin                                                                                                                                                                                                                                                                                                           |  | Kaolin/Carragenan model                                            | Male Wistar rats         |

|                             |                                                                                                                                                                                                                                        |                                                                                                                                                                                                                                                                                         |                                                                    |                                                                                   |
|-----------------------------|----------------------------------------------------------------------------------------------------------------------------------------------------------------------------------------------------------------------------------------|-----------------------------------------------------------------------------------------------------------------------------------------------------------------------------------------------------------------------------------------------------------------------------------------|--------------------------------------------------------------------|-----------------------------------------------------------------------------------|
|                             | antagonist increased the response of the peripheral nerve fibre endings                                                                                                                                                                |                                                                                                                                                                                                                                                                                         |                                                                    |                                                                                   |
| Liu et al., 2001 (67)       | Upregulation of spinal galanin expression following damage to a peripheral nerve, with no direct effect on basal spinal excitability                                                                                                   |                                                                                                                                                                                                                                                                                         | Sciatic nerve axotomy                                              | Adult mice of both sexes                                                          |
| Macdonald et al., 2001 (68) | Upregulation of galanin in DRG somata after axotomy. Galanin+ axons sprout within the DRGs containing neurones that project into damaged peripheral nerves, forming varicose rings around DRG somata                                   |                                                                                                                                                                                                                                                                                         | Spinal or sciatic nerve axotomy                                    | Female Wistar rats                                                                |
| Kerr et al., 2001 (69)      | Intrathecal infusion of low-dose galanin in normal rats – pronociceptive effect (mechanical and cold allodynia)                                                                                                                        | A low dose of galanin has a nociceptive role at the spinal cord level mediated by GalR2 receptors, whereas the antiallodynic effect of high-dose galanin on neuropathic pain is mediated by the GalR1 receptors. Thus, a selective GalR1 agonist may be used to treat neuropathic pain. | Chronic constriction injury (CCI) of the sciatic nerve             | Male Sprague-Dawley rats                                                          |
| Bird et al., 2002 (70)      | Increased expression of galanin in the central region of IAN neuromas at 3 days after nerve section and ligation                                                                                                                       | No changes in expression of GalR2 following PSNL                                                                                                                                                                                                                                        | Partial sciatic nerve ligation (PSNL)                              | Male Wistar rats                                                                  |
| Flatters et al., 2002 (71)  | Spinal administration of galanin - antinociceptive effect (inhibition of up to 80% of responses to both natural and electrical stimuli)                                                                                                |                                                                                                                                                                                                                                                                                         | Chronic constriction injury (CCI) of the sciatic nerve             | Male Wistar rats                                                                  |
| Bao et al., 2002 (72)       | After axotomy, galanin was expressed in many small and some large neurons in the spinal cord. Increase in galanin-nerve fibres in laminae I–II, with a very limited expansion into lamina III, 14 days after sciatic nerve transection |                                                                                                                                                                                                                                                                                         | Inferior alveolar nerve neuroma (IAN)                              | Both male and female ferrets                                                      |
| Sun et al., 2003 (73)       | Intra-ARC administration of galanin - antinociceptive effect. Both exogenous and endogenous galanin plays an antinociceptive role in the ARC                                                                                           |                                                                                                                                                                                                                                                                                         | Carrageenan-induced inflammation                                   | Male Wistar rats                                                                  |
| Blakeman et al., 2003 (74)  |                                                                                                                                                                                                                                        | GalR1 Knockout - pronociceptive (mechanical and thermal). Galanin produces antinociception in rodents through activation of GalR1                                                                                                                                                       | Photochemically induced sciatic nerve injury + sciatic nerve crush | GalR1 <sup>-/-</sup> , wild type (GalR1 <sup>+/+</sup> ) and GalR1 <sup>+/-</sup> |
| Wang et al., 2003 (75)      | In SNL rats, upregulation of galanin-positive neurons in ipsilateral L5 DRG neurons and in the dorsal horn laminae I–III                                                                                                               |                                                                                                                                                                                                                                                                                         | Spinal nerve ligation (SNL)                                        | Male Sprague-Dawley rats                                                          |
| Flatters et al., 2003 (76)  | Galanin produced inhibitory effects in a larger proportion of the nociceptive fibres and spinal neurones examined and a                                                                                                                |                                                                                                                                                                                                                                                                                         | Spinal nerve ligation (SNL)                                        | Male Sprague-Dawley rats                                                          |

|                                   |                                                                                                                                                                                                                                          |                                                                                                                                                                       |                                                                      |                              |
|-----------------------------------|------------------------------------------------------------------------------------------------------------------------------------------------------------------------------------------------------------------------------------------|-----------------------------------------------------------------------------------------------------------------------------------------------------------------------|----------------------------------------------------------------------|------------------------------|
|                                   | more variable facilitatory effect in the remaining fibres and neurones                                                                                                                                                                   |                                                                                                                                                                       |                                                                      |                              |
| Hofmann et al., 2003 (77)         | L5 DRG mRNA expression of galanin was increased from day 2 to day 12 in tibial nerve injury rats                                                                                                                                         |                                                                                                                                                                       | Tibial nerve injury                                                  | Male Wistar rats             |
| Jimenez-Andrade et al., 2004 (78) | Intraplantar administration of galanin at low doses - pronociceptive effect (increases CAP-evoked nociceptive behaviours). Galanin does not modify activity of nociceptors but markedly enhances CAP-induced excitation of these fibres. | The pronociceptive effect of galanin at low doses is attributed to activation of peripheral GalR2. GalR2 are highly expressed in L5 dorsal root ganglion (DRG) cells  | Capsaicin (CAP)                                                      | Male Sprague-Dawley rats     |
| Sun et al., 2004 (79)             | Intra-TM administration of galanin – antinociceptive effect                                                                                                                                                                              | Increase in GalR1-positive neurons in the ipsilateral TM after CCI induction, but with no changes after carrageenan-induced inflammation.                             | Carrageenan-induced inflammation + Chronic constriction injury (CCI) | Male Wistar rats             |
| Imbe et al., 2004 (80)            | Increase in galanin-positive neurons in the arcuate nucleus of the hypothalamus in SNI animals.                                                                                                                                          |                                                                                                                                                                       | Spared nerve injury (SNI)                                            | Male Sprague–Dawley rats     |
| Hygge-Blakeman et al., 2004 (81)  | Overexpression of galanin - antinociceptive effect.                                                                                                                                                                                      |                                                                                                                                                                       | Photochemically induced sciatic nerve injury + sciatic nerve crush   | Male C57/BL/6J mice (GAL-OE) |
| Peters et al., 2005 (82)          | Tumour-bearing animals displayed increased galanin expression in ipsilateral DRG.                                                                                                                                                        |                                                                                                                                                                       | Sarcoma induced bone cancer                                          | Male C3H/HeJ mice            |
| Xiong et al., 2005 (83)           | Intrathecal administration of galanin – antinociceptive effect (thermal and mechanical stimulation) in both intact rats and rats with inflammation.                                                                                      |                                                                                                                                                                       | Carrageenan-induced inflammation                                     | Male Sprague-Dawley rats     |
| Jimenez-Andrade et al., 2005 (84) | Intraplantar administration of galanin at low doses – pronociceptive effect (increases CAP-evoked nociceptive behaviours).                                                                                                               |                                                                                                                                                                       | Capsaicin (CAP)                                                      | Male Wistar rats             |
| Malkmus et al., 2005 (85)         |                                                                                                                                                                                                                                          | GalR1 knockout mice have no differences concerning acute nociception but showed a modest tendency towards increased hyperalgesia after tissue injury and inflammation | Spinal nerve ligation (SNL)                                          | Male C57BL/6J mice           |

|                                   |                                                                                                                                                                                                                               |                                                                                                                                                                                                                                       |                                                        |                          |
|-----------------------------------|-------------------------------------------------------------------------------------------------------------------------------------------------------------------------------------------------------------------------------|---------------------------------------------------------------------------------------------------------------------------------------------------------------------------------------------------------------------------------------|--------------------------------------------------------|--------------------------|
| Garry et al., 2005 (86)           | Upregulation in galanin protein expression in dorsal root ganglia ipsilateral to VZV injection.                                                                                                                               |                                                                                                                                                                                                                                       | Varicella Zoster Virus (VZV) Infection                 | Male Wistar rats         |
| Lu et al., 2005 (87)              | The spinal content of galanin and increased gradually and reached the highest level at 24 h after colorectal distension.                                                                                                      |                                                                                                                                                                                                                                       | Colorectal distension (CRD)                            | Male Sprague-Dawley rats |
| Holmberg et al., 2005 (88)        | Overexpression of galanin leads to a high galanin expression in neuronal cell bodies in autonomic ganglia, DRG and motoneurons + high levels of galanin in nerve terminals in peripheral tissues innervated by these ganglia. |                                                                                                                                                                                                                                       | Sciatic nerve axotomy                                  | Gal-OE mice              |
| Jimenez-Andrade et al., 2006 (89) | Intraplantar galanin at low concentrations – pronociceptive.                                                                                                                                                                  | Peripheral activation of GalR1 with M617 - antinociceptive effect (reduces CAP-induced inflammatory pain).<br>Peripheral activation of GalR2 with AR-M1896 - pronociceptive effect                                                    | Capsaicin (CAP)                                        | Male Wistar rats         |
| Shi et al., 2006 (90)             |                                                                                                                                                                                                                               | Lack of the GalR2 results in a considerable developmental loss of DRG neurons.<br>The deletion of this receptor does not influence the expression of galanin.                                                                         | Spinal nerve injury                                    | GalR2 KO mice            |
| Brumovsky et al., 2006 (91)       |                                                                                                                                                                                                                               | Axotomy induced a strong increase in intensity and number of GalR2 positive motoneurons ipsilateral to the lesion.<br>In contrast, nerve cut or hindpaw inflammation did not alter the expression of Gal1 or Gal2 in the dorsal horn. | Sciatic nerve axotomy                                  | Male Sprague-Dawley rats |
| Wilson-Gerwing & Verge, 2006 (92) | Detectable galanin mRNA is limited to a small number of DRG neurons in the intact state and is dramatically upregulated after CCI.                                                                                            |                                                                                                                                                                                                                                       | Chronic constriction injury (CCI) of the sciatic nerve | Male Wistar rats         |
| Wallace et al., 2007 (93)         | Increase in galanin expression in the DRG ipsilateral to virus injection.                                                                                                                                                     |                                                                                                                                                                                                                                       | HIV-induced painful peripheral neuropathy              | Male Wistar rats         |



|                            |                                                                                                                                                                                                                                                      |  |                                                        |                                      |
|----------------------------|------------------------------------------------------------------------------------------------------------------------------------------------------------------------------------------------------------------------------------------------------|--|--------------------------------------------------------|--------------------------------------|
| Wang et al., 2007 (94)     | Peripheral nerve injury induces an expansion of the central projection of galanin-containing afferents in lamina II of the monkey spinal cord, not only by increasing galanin levels in primary afferents but also by triggering afferent branching. |  | Sciatic nerve axotomy                                  | Male monkeys                         |
| Gu et al., 2007 (95)       | Intra-ARC injection of galanin - antinociceptive effect (mechanical and thermal behaviour).<br>Both endogenous and exogenous galanin were involved in the regulation of nociception in the ARC of rats with peripheral nerve injury.                 |  | Sciatic nerve ligation                                 | Male Wistar rats                     |
| Nishii et al., 2007 (96)   | Galanin mRNA levels in the CP-treated group increased significantly in the ARC and the paraventricular nucleus, but not in the medial preoptic area.                                                                                                 |  | Cyclophosphamide (CP)-induced cystitis (Visceral pain) | Male C57BL/6J mice                   |
| Hulse et al., 2008 (97)    | Increase of galanin-expressing neurons in L3 and L4 DRG ipsilateral but not contralateral to the injury.                                                                                                                                             |  | Partial saphenous nerve ligation injury (PSNI)         | Both male and female 129/OlaHsd mice |
| Coronel et al., 2008 (98)  | SLNC induced a gradual increase in the number of galanin-positive neurons, in direct correlation with the degree of constriction in the DRG and spinal cord.                                                                                         |  | Single ligature nerve constriction (SLNC)              | Male Sprague-Dawley rats             |
| Jung et al., 2009 (99)     | High doses of galanin - antinociceptive effect (inhibited neuropathic pain behaviours).                                                                                                                                                              |  | Spared nerve injury (SNI)                              | Male Sprague-Dawley rats             |
| Coronel et al., 2009 (100) | CCI induced an ipsilateral increase in the number of galanin immunoreactive neurons.                                                                                                                                                                 |  | Chronic constriction injury (CCI) of the sciatic nerve | Male Sprague-Dawley rats             |
| An et al., 2010 (101)      | Subarachnoid transplantation of immortalized galanin-overexpressing astrocytes - antinociceptive effect in chronic neuropathic pain of SNI rats.                                                                                                     |  | Spared nerve injury (SNI)                              | Male Sprague-Dawley rats             |
| Pope et al., 2010 (102)    | Overexpression of galanin – antinociceptive effect (attenuated allodynia).<br>Galanin suppression – pronociceptive effect (increase in allodynia).                                                                                                   |  | Sciatic nerve axotomy                                  | Transgenic mice (CBA/B6 strain)      |

|                           |                                                                                                                                                                                                                                                                                                      |                                                                                                                                                                                                                                                                    |                                                                                 |                                                                        |
|---------------------------|------------------------------------------------------------------------------------------------------------------------------------------------------------------------------------------------------------------------------------------------------------------------------------------------------|--------------------------------------------------------------------------------------------------------------------------------------------------------------------------------------------------------------------------------------------------------------------|---------------------------------------------------------------------------------|------------------------------------------------------------------------|
| Zhang et al., 2011 (103)  | Galanin upregulation in DRG and sciatic nerve after nerve injury.                                                                                                                                                                                                                                    |                                                                                                                                                                                                                                                                    | Chronic constriction injury (CCI) of the sciatic nerve                          | Male GFAP-IkB $\alpha$ -dn + WT mice                                   |
| Hulse et al., 2011 (104)  | Exogenous galanin altered the responses of mechano-nociceptive C-fibre afferents in a dose-dependent manner in both naive and nerve-injured animals, with low concentrations facilitating and high markedly inhibiting mechano-nociceptor activity.                                                  | The effects of galanin were mediated by activation of GalR2.                                                                                                                                                                                                       | Partial saphenous nerve ligation injury (PSNI)                                  | Male Wistar rats, male Gal-OE and strain matched wildtype CBA/BL6 mice |
| Hulse et al., 2012 (105)  | Intra-arterial infusion of galanin – antinociceptive effect (inhibits acetone and menthol responses) in the naive rodent and following models of neuropathic and inflammatory pain. Overexpression of galanin after nerve injury in the DRG - antinociceptive (inhibition of cooling pain responses) | The modulatory effects of galanin on cooling are independent of GalR2 and GalR3 activation, but mediated by activation of GalR1.                                                                                                                                   | Carrageenan-induced inflammation + partial sciatic nerve ligation injury (PSNI) | Male Wistar Han rats + transgenic mice                                 |
| Yang et al., 2012 (106)   | Upregulation of Gal in DRG and dorsal horn caused by sciatic nerve-pinch injury. Exogenous Gal administration - antinociceptive role (relieving pain and shortening recovery time of pain behaviour).                                                                                                | Gal, GalR1 and GalR2 show great expression plasticity in DRG and dorsal horn after nerve injury and intrathecal injection of exogenous Gal.                                                                                                                        | Sciatic nerve-pinch injury                                                      | Male rats                                                              |
| Xu et al., 2012 (107)     | Intrathecal administration of exogenous galanin – antinociceptive effect (attenuated diabetic and neuropathic pain)                                                                                                                                                                                  | (1) GalR1 expression decreased in SDH in diabetic rats; (2) GalR2 expression decreased in dorsal root ganglia and SDH in diabetic rats; (3) intrathecal administration of GalR1 agonist M617, but not GalR2 agonist AR-M1896, attenuated diabetic neuropathic pain | Streptozotocin-induced diabetes                                                 | Male Wistar rats                                                       |
| Amorim et al., 2014 (108) | Administration of galanin to the dorsomedial hypothalamic nucleus – pronociceptive in awake healthy and arthritic animals. Increase in galanin expression in the rostral ventromedial medulla and the dorsal raphe nucleus.                                                                          | The exogenous galanin pronociceptive effect was mediated by GalR1 but not GalR2.                                                                                                                                                                                   | Kaolin/Carrageenan model                                                        | Male Wistar Han rats                                                   |

|                             |                                                                                                                                                                                                                                                                                                                                                  |                                                                                                                                                                                                                      |                                                                          |                                                 |
|-----------------------------|--------------------------------------------------------------------------------------------------------------------------------------------------------------------------------------------------------------------------------------------------------------------------------------------------------------------------------------------------|----------------------------------------------------------------------------------------------------------------------------------------------------------------------------------------------------------------------|--------------------------------------------------------------------------|-------------------------------------------------|
| Su et al., 2015 (109)       | Increase in galanin-expressing neurons in the DRG, both 15 and 47 days after arthritis induction.                                                                                                                                                                                                                                                |                                                                                                                                                                                                                      | Collagen antibody-induced arthritis (CAIA)                               | Male CBA mice                                   |
| Yang et al., 2015 (110)     | Intra-NAc injection of galanin - antinociceptive effect in rats with inflammatory pain.                                                                                                                                                                                                                                                          | Both GalR1 and GalR2 expression were upregulated in NAc of rats with inflammatory pain.                                                                                                                              | Carrageenan-induced inflammation                                         | Male Sprague-Dawley rats                        |
| Metcalf et al., 2015 (111)  |                                                                                                                                                                                                                                                                                                                                                  | GalR2-preferring galanin analogue - antinociceptive                                                                                                                                                                  | Carrageenan-induced inflammation + partial sciatic nerve ligation (PSNL) | Male albino CF-1 mice, Male Sprague-Dawley rats |
| Reinhold et al., 2015 (112) | Galanin expression was considerably augmented in damaged neurons                                                                                                                                                                                                                                                                                 | Increased expression of galanin receptor Gpr151 in damaged neurons                                                                                                                                                   | Chronic constriction injury (CCI) of the sciatic nerve                   | Female C57/BL6 mice                             |
| Duan et al., 2015 (113)     | Intra-NAc injection of M617 and galanin - antinociceptive. Galanin-induced antinociception being stronger than M617.                                                                                                                                                                                                                             | The expression of GalR1 is significantly upregulated in the NAc of rats with sciatic neuropathy. GalR1 mediates the antinociceptive effect of galanin in the NAc of rats with sciatic nerve ligation.                | Chronic constriction injury (CCI) of the sciatic nerve                   | Male Sprague-Dawley rats                        |
| Boateng et al., 2015 (114)  | TNT injury was associated with significant galanin immunoreactivity in both NF-200 and peripherin-immunoreactive cells, and both cell populations demonstrated dynamic and similar significant temporal profiles                                                                                                                                 |                                                                                                                                                                                                                      | Tibial nerve transection (TNT)                                           | Male Wistar rats                                |
| Wu et al., 2016 (115)       |                                                                                                                                                                                                                                                                                                                                                  | Decreased expression of GalR1 after peripheral nerve injury                                                                                                                                                          | Spinal nerve ligation + Carrageenan                                      | Male C57BL/6 mice                               |
| Xu et al., 2016 (116)       | Exogenous galanin had an antinociceptive effect (alleviated the neuropathic pain) and promoted sciatic nerve regeneration more effectively in diabetic rats than after sciatic nerve pinch injury. Galanin mRNA expression was dramatically upregulated after sciatic nerve pinch injury in the DRG and dorsal horn of diabetic and normal rats. | GalR1 was downregulated in the dorsal horn of diabetic rats and further decreased after sciatic nerve pinch injury. GalR2 mRNA expression was downregulated in both the DRG and spinal dorsal horn of diabetic rats. | Streptozotocin-induced diabetes + Sciatic nerve pinch                    | Male Wistar rats                                |

|                            |                                                                                                                                                                                                                                                                            |                                                                                                                                                                                                                                                                                                                 |                                                      |                          |
|----------------------------|----------------------------------------------------------------------------------------------------------------------------------------------------------------------------------------------------------------------------------------------------------------------------|-----------------------------------------------------------------------------------------------------------------------------------------------------------------------------------------------------------------------------------------------------------------------------------------------------------------|------------------------------------------------------|--------------------------|
|                            |                                                                                                                                                                                                                                                                            | After sciatic nerve pinch injury, GalR2 mRNA expression was upregulated in both the DRG and dorsal horn of normal and diabetic rats                                                                                                                                                                             |                                                      |                          |
| Zhang et al., 2016 (117)   | Three days after orthopaedic surgery, the proportion of galanin-positive neurons was increased ipsilaterally but dropped after 2 wk.<br>After axotomy, the levels of galanin were increased after 3 days and remained up-regulated for 2 weeks, although slightly reduced. |                                                                                                                                                                                                                                                                                                                 | Tibial fracture with pinning + sciatic nerve axotomy | Male C57BL/6 mice        |
| Boltz et al., 2016 (118)   |                                                                                                                                                                                                                                                                            | GalR3 does not mediate mechanical hyperalgesia in autoimmune arthritis                                                                                                                                                                                                                                          | Autoimmune arthritis                                 | Male GalR3-KO mice       |
| Zhang et al., 2017 (119)   | Intra-ACC injection of galanin - antinociceptive in rats with acute inflammation.<br>Galanin mRNA expression and galanin content increased in ACC in rats with acute inflammation.                                                                                         | The antinociceptive effect was attenuated by intra-ACC injection of the GalR2 antagonist M871 - involvement of GalR2 in nociceptive modulation in ACC in rats with acute inflammation.<br>Both the mRNA levels of GalR2 and the content of GalR2 in ACC increased significantly in rats with acute inflammation | Carrageenan-induced inflammation                     | Male Sprague-Dawley rats |
| Holmes et al., 2017 (120)  | A marked increase in galanin mRNA levels after nerve injury.                                                                                                                                                                                                               | Decrease in expression of GalR1 and GalR2 after nerve injury                                                                                                                                                                                                                                                    | Sciatic nerve axotomy                                | Male 129/OlaHsd mice     |
| Coronel et al., 2017 (121) | One day after spinal cord injury, no changes in galanin mRNA expression levels.<br>In contrast to the acute phase, a significant increase in galanin mRNA levels was detected 28 days after injury.                                                                        | One day after spinal cord injury, we found a significant decrease in GalR2 mRNA levels, with no changes in GalR1 mRNA expression levels.<br>The spinal cord lesion also induced a late increase in GalR1 expression.                                                                                            | Spinal cord injury                                   | Male Sprague-Dawley rats |

|                                    |                                                                                                                                                                                                                                                                                      |                                                                                                                                                                                                                                |                                                        |                                                           |
|------------------------------------|--------------------------------------------------------------------------------------------------------------------------------------------------------------------------------------------------------------------------------------------------------------------------------------|--------------------------------------------------------------------------------------------------------------------------------------------------------------------------------------------------------------------------------|--------------------------------------------------------|-----------------------------------------------------------|
|                                    |                                                                                                                                                                                                                                                                                      | Similar to findings in the acute phase, at this time point injured animals showed reduced GalR2 mRNA levels                                                                                                                    |                                                        |                                                           |
| (122)                              | Intra-ACC injection of galanin – antinociceptive effect in normal rats and rats with mononeuropathy.                                                                                                                                                                                 | GalR2 is involved in the galanin-induced antinociception in the ACC in normal rats and rats with mononeuropathy.                                                                                                               | Chronic constriction injury (CCI) of the sciatic nerve | Male Sprague–Dawley rats                                  |
| Li et al., 2017 (123)              | Intra-CeA administration of galanin - antinociceptive effect in normal rats and rats with neuropathy                                                                                                                                                                                 | Upregulation of GalR1 expression in rats with neuropathy                                                                                                                                                                       | Chronic constriction injury (CCI) of the sciatic nerve | Male Sprague–Dawley rats                                  |
| Chen et al., 2018 (124)            | Median nerve injury upregulated amounts of galanin-positive neurons in injured DRG.                                                                                                                                                                                                  | Nerve injury upregulated amounts of GalR2-positive neurons in injured DRG. Treatment with the GalR2 antagonist M871 ameliorated CCI-induced mechanical hypersensitivity, but it was exaggerated by the GalR2 agonist AR-M1896. | Median nerve chronic constriction injury (CCI)         | Male Sprague–Dawley rats                                  |
| Fernandez-Zafra et al., 2019 (125) | No change in expression levels of galanin                                                                                                                                                                                                                                            |                                                                                                                                                                                                                                | Collagen antibody-induced arthritis (CAIA)             | Male and female Balb/cAnNRj, CBA (Harlan), and C57BL/6JRj |
| Zhang et al., 2019a (126)          | Intra-NAc injection of galanin - dose-dependent antinociceptive effect (noxious thermal and mechanical stimulation) in mono-neuropathic rats and that this effect was stronger than that in intact rats. Galanin expression in the NAc was upregulated after sciatic nerve ligation. | The intra-NAc injection of the non-selective GalR antagonist galantide reduced the mechanical threshold in the rats with neuropathic pain, but there was no influence of galantide in intact rats.                             | Chronic constriction injury (CCI) of the sciatic nerve | Male Sprague–Dawley rats                                  |

|                           |                                                                                                                                                                                                                                       |                                                                                                                                                                                                    |                                                                        |                          |
|---------------------------|---------------------------------------------------------------------------------------------------------------------------------------------------------------------------------------------------------------------------------------|----------------------------------------------------------------------------------------------------------------------------------------------------------------------------------------------------|------------------------------------------------------------------------|--------------------------|
| Zhang et al., 2019b (127) | M35 (galanin antagonist) in the nucleus accumbens blocked the galanin-associated antinociception of rats with mononeuropathy, but M35 alone did not affect HWLs                                                                       | GalR1 activation results in the inhibition of the PKA, leading to antinociception for neuropathic pain in the NAc of rats                                                                          | Chronic constriction injury (CCI) of the sciatic nerve                 | Male Sprague-Dawley rats |
| Lyu et al., 2020 (128)    |                                                                                                                                                                                                                                       | Increased expression of GalR2 in DRG neurons                                                                                                                                                       | Spared nerve injury (SNI)                                              | Male C57BL/6N mice       |
| Liu et al., 2020 (129)    | The transection of ION/IAN increased both galanin mRNA and peptide levels in the rat trigeminal ganglia. Galanin levels were elevated in both injured and adjacent uninjured small and medium-sized neurons after ION/IAN transection | The levels of GalR2 immunoreactivity were reduced in both injured and adjacent uninjured trigeminal ganglia neurons after ION/IAN transection, while levels of GalR1 and GalR3 remained unchanged. | infraorbital nerve (ION) and inferior alveolar nerve (IAN) transection | Male Wistar rats         |
| Li et al., 2021 (130)     |                                                                                                                                                                                                                                       | GalR2 is involved in the galanin-induced analgesic effect by activating CaMKII and PKC in the NAc of inflammatory pain rats                                                                        | Carrageenan-induced inflammation                                       | Male Sprague-Dawley rats |
| Dong et al., 2021 (131)   |                                                                                                                                                                                                                                       | GalR2 is activated in the NAc from day 14 to day 28 after nerve injury.                                                                                                                            | Chronic constriction injury (CCI) of the sciatic nerve                 | Male Sprague-Dawley rats |
